# Supplementary material
Source: publisher figshare collection journal article supplement (https://gsapubs.figshare.com/ndownloader/files/22747769)
Supplement: Supplementary file 1 [file 22747769]

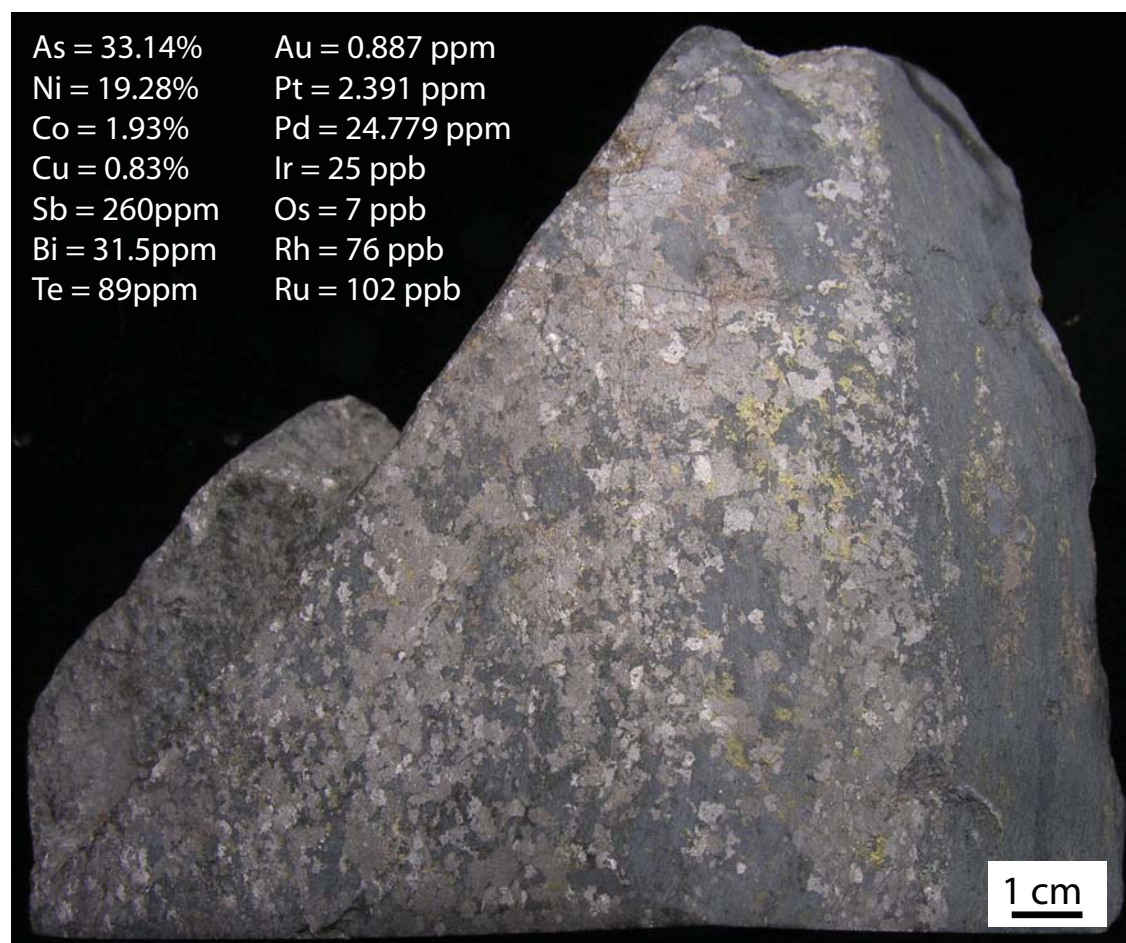

Figure DR1. A sample of massive gersdorffite (NiAsS), with minor pyrrhotite and chalcopyrite, from the Garson deposit, Sudbury. The bulk composition of an offcut from this sample is given (Fe is not included because there are Fe-bearing silicate phases in this sample).

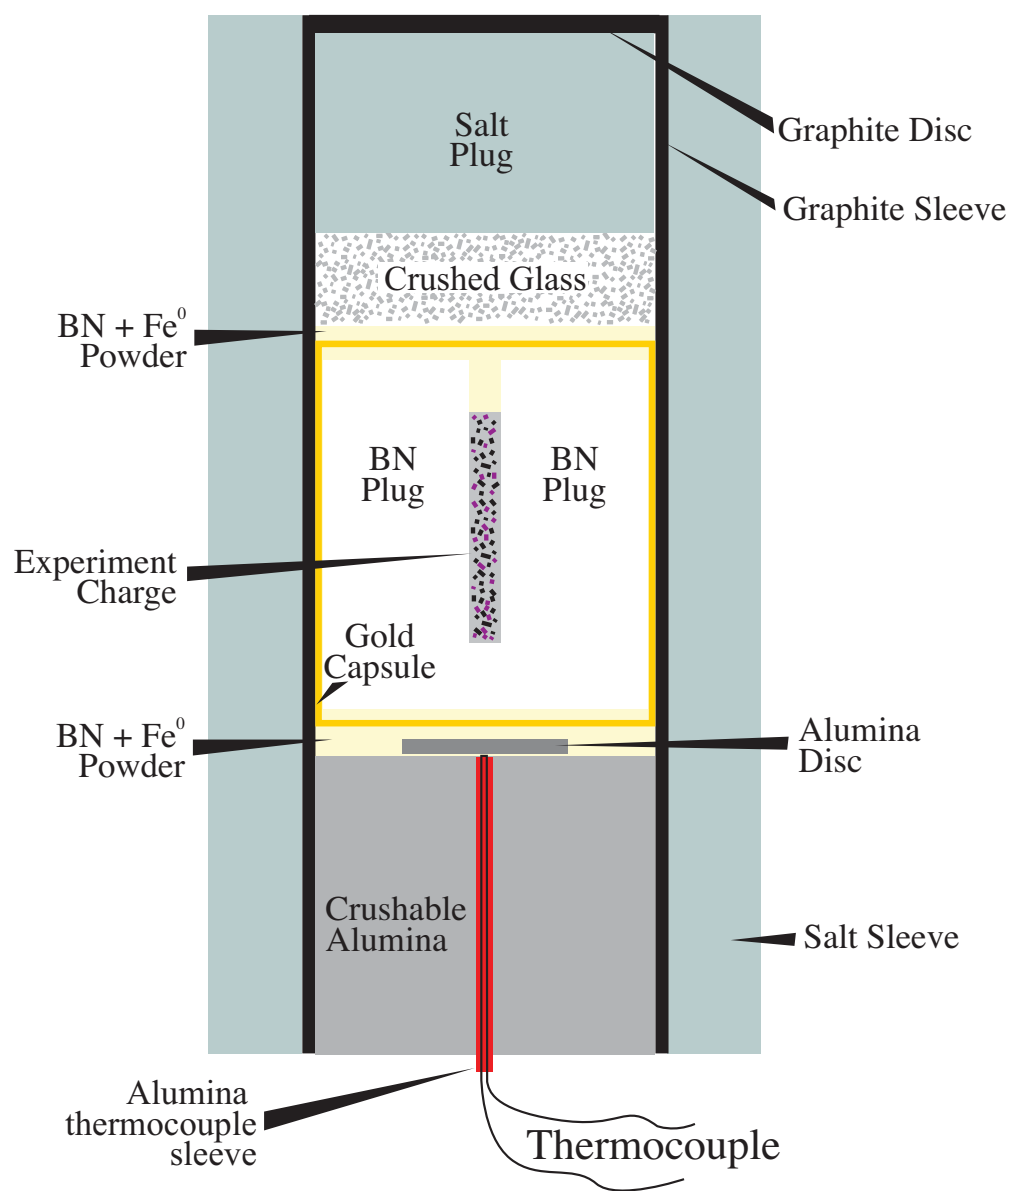

Figure DR2. Design of the experiment assembly used in this study.
